# Supplementary material for: In Silico Evaluation, Phylogenetic Analysis, and Structural Modeling of the Class II Hydrophobin Family from Different Fungal Phytopathogens
Source: MDPI journal article supplement (doi:10.3390/microorganisms11112632), 2023-10-26
Supplement: s1 [file s1]

# MolProbity Ramachandran analysis

rel\_AF2MR\_TS2\_2\_1\_trimmed.pdb, model 1

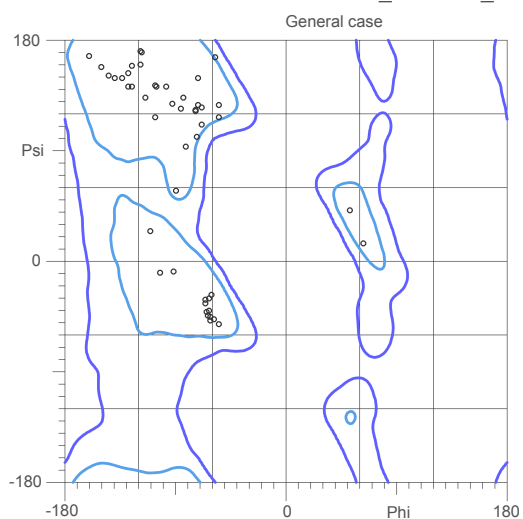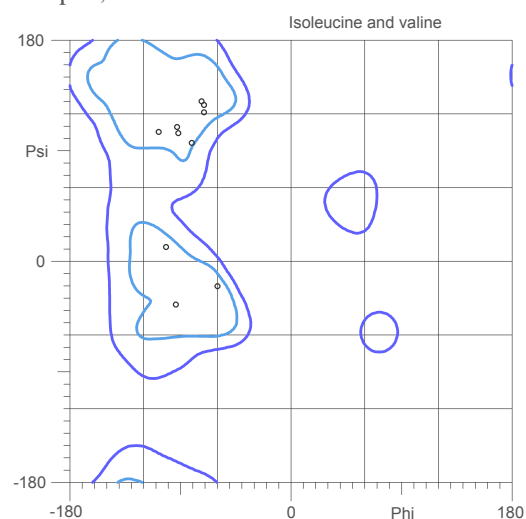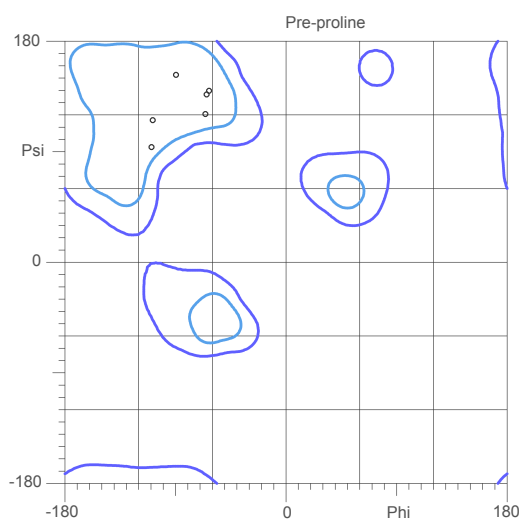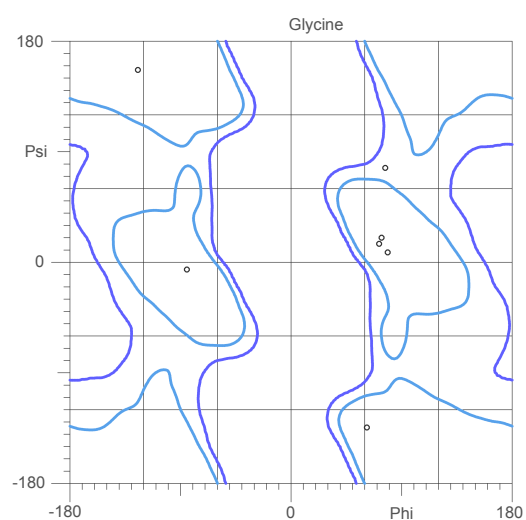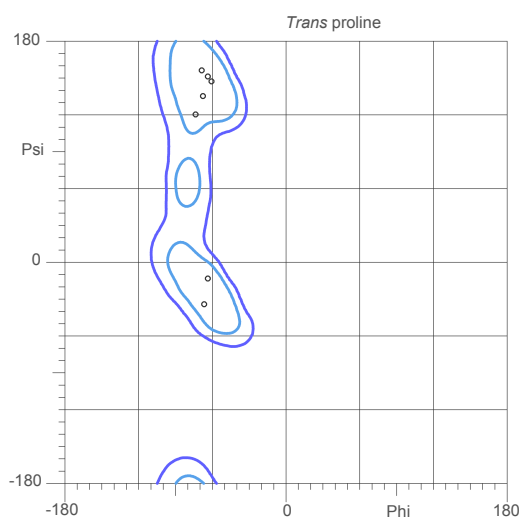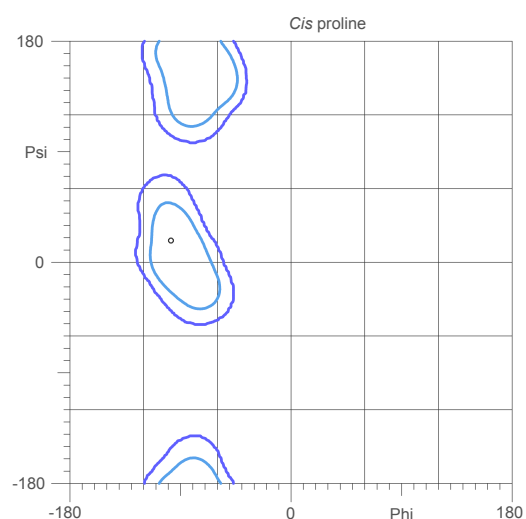

97.5% (77/79) of all residues were in favored (98%) regions.  
100.0% (79/79) of all residues were in allowed (>99.8%) regions.

There were no outliers.
