# Supplementary material for: In Silico Evaluation, Phylogenetic Analysis, and Structural Modeling of the Class II Hydrophobin Family from Different Fungal Phytopathogens
Source: MDPI journal article supplement (doi:10.3390/microorganisms11112632), 2023-10-26
Supplement: s1 [file s1]

Supplementary Table S1: Details of forty-five different HFBII from different fungal sources used in the study.

| Serial No | Fungal Name                                        | Protein name         | Gene        | Accession number | Sequence Length (aa) |
|-----------|----------------------------------------------------|----------------------|-------------|------------------|----------------------|
| 1         | <i>Botrytis cinerea</i><br><i>BcDW1</i>            | Hydrophobin class II | <i>N/A</i>  | EMR84211.1       | 120                  |
| 2         | <i>Botrytis cinerea</i>                            | Hydrophobin class II | <i>Bhp2</i> | CCD47622.1       | 98                   |
| 3         | <i>Botrytis cinerea</i> <i>T4</i>                  | Hydrophobin class II | <i>Bhp3</i> | CCD49285.1       | 98                   |
| 4         | <i>Botrytis fragariae</i>                          | Hydrophobin class II | <i>N/A</i>  | XP_037187260.1   | 98                   |
| 5         | <i>Cadophora</i> sp.<br><i>DSE1049</i>             | Hydrophobin class II | <i>Bhp2</i> | PVH84708.1       | 95                   |
| 6         | <i>Cercospora beticola</i>                         | Cryparin             | <i>N/A</i>  | XP_023448514.1   | 102                  |
| 7         | <i>Clonostachys rosea</i>                          | Hydrophobin class II | <i>N/A</i>  | AHL20218.1       | 98                   |
| 8         | <i>Colletotrichum camelliae</i>                    | cerato-ulmin         | <i>N/A</i>  | KAH0440693.1     | 103                  |
| 9         | <i>Colletotrichum fruticola</i>                    | Cryparin             | <i>CRP</i>  | KAF4898778.1     | 97                   |
| 10        | <i>Colletotrichum liriopes</i>                     | Cryparin             | <i>N/A</i>  | GJC80504.1       | 99                   |
| 11        | <i>Colletotrichum sidae</i>                        | Cryparin             | <i>CRP</i>  | TEA18123.1       | 98                   |
| 12        | <i>Colletotrichum spaethianum</i>                  | Cryparin             | <i>N/A</i>  | XP_049133698.1   | 99                   |
| 13        | <i>Colletotrichum viniferum</i>                    | Cryparin             | <i>CRP</i>  | KAF4902232.1     | 97                   |
| 14        | <i>Cryphonectria parasitica</i> <i>EP155</i>       | Cryparin             | <i>CRP</i>  | XP_040773037.1   | 118                  |
| 15        | <i>Diaporthaceae</i> sp.<br><i>PMI_573</i>         | Cryparin             | <i>N/A</i>  | KAH8763703.1     | 106                  |
| 16        | <i>Diaporthaceae</i> sp.<br><i>PMI_573</i>         | cerato-ulmin         | <i>CU</i>   | KAH8785973.1     | 99                   |
| 17        | <i>Diaporthe ampelina</i>                          | cerato-ulmin         | <i>N/A</i>  | KKY33170.1       | 115                  |
| 18        | <i>Elsinoe australis</i>                           | cryparin             | <i>N/A</i>  | TKX25784.1       | 97                   |
| 19        | <i>Fulvia fulva</i>                                | cryparin             | <i>N/A</i>  | XP_047765241.1   | 88                   |
| 20        | <i>Fusarium avenaceum</i>                          | cerato-ulmin         | <i>N/A</i>  | KAH6952921.1     | 98                   |
| 21        | <i>Fusarium oxysporum</i>                          | cerato-ulmin         | <i>N/A</i>  | KAH7211526.1     | 98                   |
| 22        | <i>Fusarium oxysporum</i><br><i>f. sp. cubense</i> | cerato-ulmin         | <i>CU</i>   | TVY61978.1       | 100                  |
| 23        | <i>Fusarium oxysporum</i><br><i>f. sp. raphani</i> | cerato-ulmin         | <i>CU</i>   | KAG7411596.1     | 100                  |
| 24        | <i>Fusarium redolens</i>                           | cerato-ulmin         | <i>N/A</i>  | XP_046050534.1   | 98                   |

|    |                                                 |                      |             |                |     |
|----|-------------------------------------------------|----------------------|-------------|----------------|-----|
| 25 | <i>Fusarium solani</i>                          | cerato-ulmin         | <i>N/A</i>  | XP_046128069.1 | 96  |
| 26 | <i>Fusarium tricinctum</i>                      | cerato-ulmin         | <i>N/A</i>  | KAH7242123.1   | 98  |
| 27 | <i>Geosmithia langdonii</i>                     | Hydrophobin class II | <i>geol</i> | CDK12896.1     | 105 |
| 28 | <i>Geosmithia pallida</i>                       | Hydrophobin class II | <i>geol</i> | CDK12887.1     | 112 |
| 29 | <i>Lasiodiplodia theobromae</i>                 | cerato-ulmin         | <i>CU_0</i> | KAB2579811.1   | 91  |
| 30 | <i>Leotiomycetes</i> sp. MPI-SDFR-AT-0126       | Hydrophobin class II | <i>Bhp2</i> | KAH7395885.1   | 95  |
| 31 | <i>Leptodontidium</i> sp. 2 PMI_412             | Hydrophobin class II | <i>Bhp2</i> | KAH9224057.1   | 95  |
| 32 | <i>Microdochium bolleyi</i>                     | cerato-ulmin         | <i>N/A</i>  | KXJ87464.1     | 111 |
| 33 | <i>Microdochium trichocladiopsis</i>            | cerato-ulmin         | <i>N/A</i>  | XP_046013164.1 | 109 |
| 34 | <i>Nemania diffusa</i>                          | cerato-ulmin         | <i>N/A</i>  | KAI1145110.1   | 100 |
| 35 | <i>Nemania serpens</i>                          | cerato-ulmin         | <i>N/A</i>  | KAI1161130.1   | 99  |
| 36 | <i>Ophiostoma quercus</i>                       | cerato-ulmin         | <i>N/A</i>  | ABR15767.1     | 99  |
| 37 | <i>Ophiostoma ulmi</i>                          | cerato-ulmin         | <i>CU</i>   | AAB41284.1     | 100 |
| 38 | <i>Pseudocercospora fuligena</i>                | Cryparin             | <i>N/A</i>  | KAF7195398.1   | 85  |
| 39 | <i>Rhexocercosporidium</i> sp. MPI-PUGE-AT-0058 | Hydrophobin class II | <i>Bhp2</i> | KAH7360233.1   | 95  |
| 40 | <i>Ustilina deusta</i>                          | cerato-ulmin         | <i>N/A</i>  | KAI3335996.1   | 140 |
| 41 | <i>Valsa mali</i>                               | Cryparin             | <i>N/A</i>  | KUI69349.1     | 105 |
| 42 | <i>Verticillium alfalfae</i> VaMs.102           | Hydrophobin class II | <i>N/A</i>  | XP_003002035.1 | 99  |
| 43 | <i>Verticillium dahliae</i>                     | Hydrophobin class II | <i>VDH1</i> | AAY89101.1     | 99  |
| 44 | <i>Verticillium dahliae</i> VdLs.17             | cerato-ulmin         | <i>N/A</i>  | XP_009650899.1 | 98  |
| 45 | <i>Xylogone</i> sp. PMI_703                     | Hydrophobin class II | <i>Bhp2</i> | KAH8809275.1   | 93  |
