# Supplementary material for: In Silico Evaluation, Phylogenetic Analysis, and Structural Modeling of the Class II Hydrophobin Family from Different Fungal Phytopathogens
Source: MDPI journal article supplement (doi:10.3390/microorganisms11112632), 2023-10-26
Supplement: s1 [file s1]

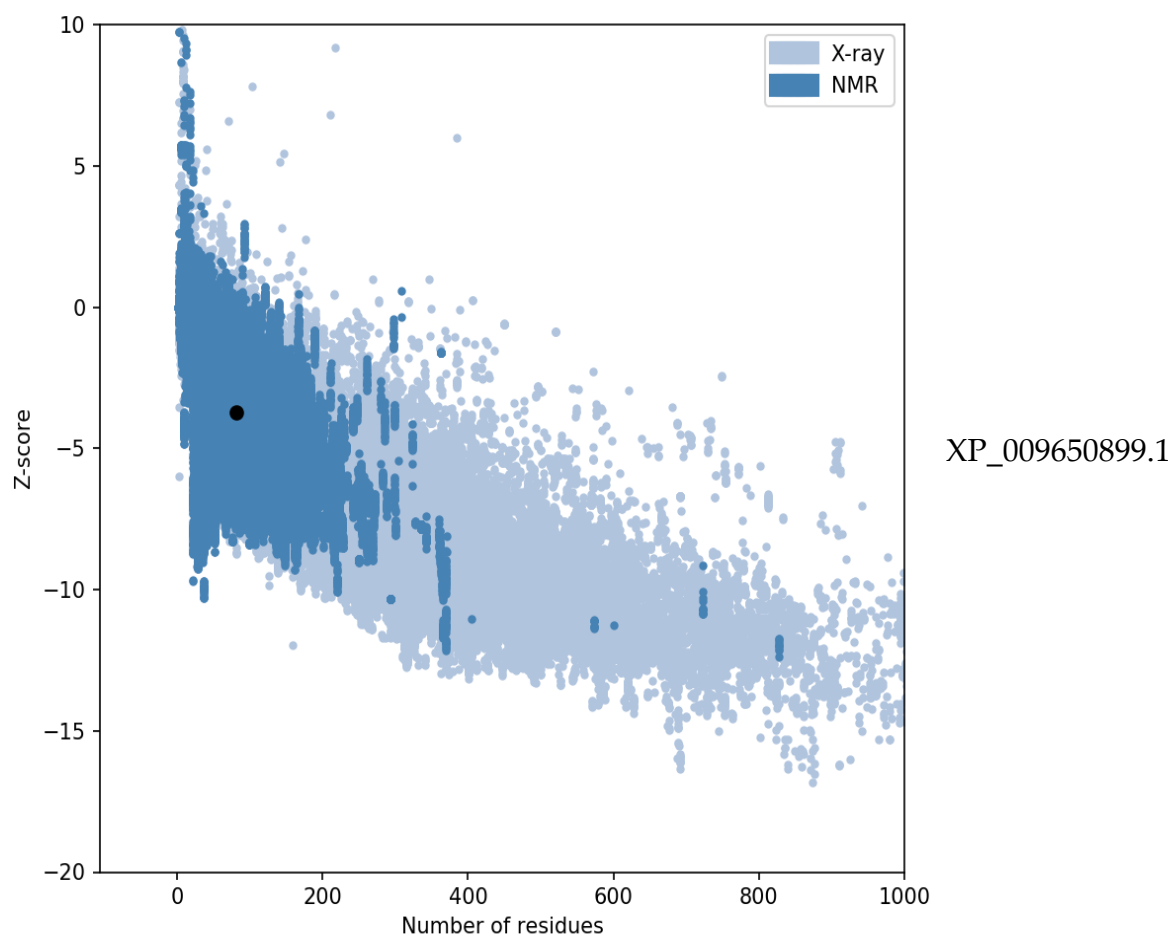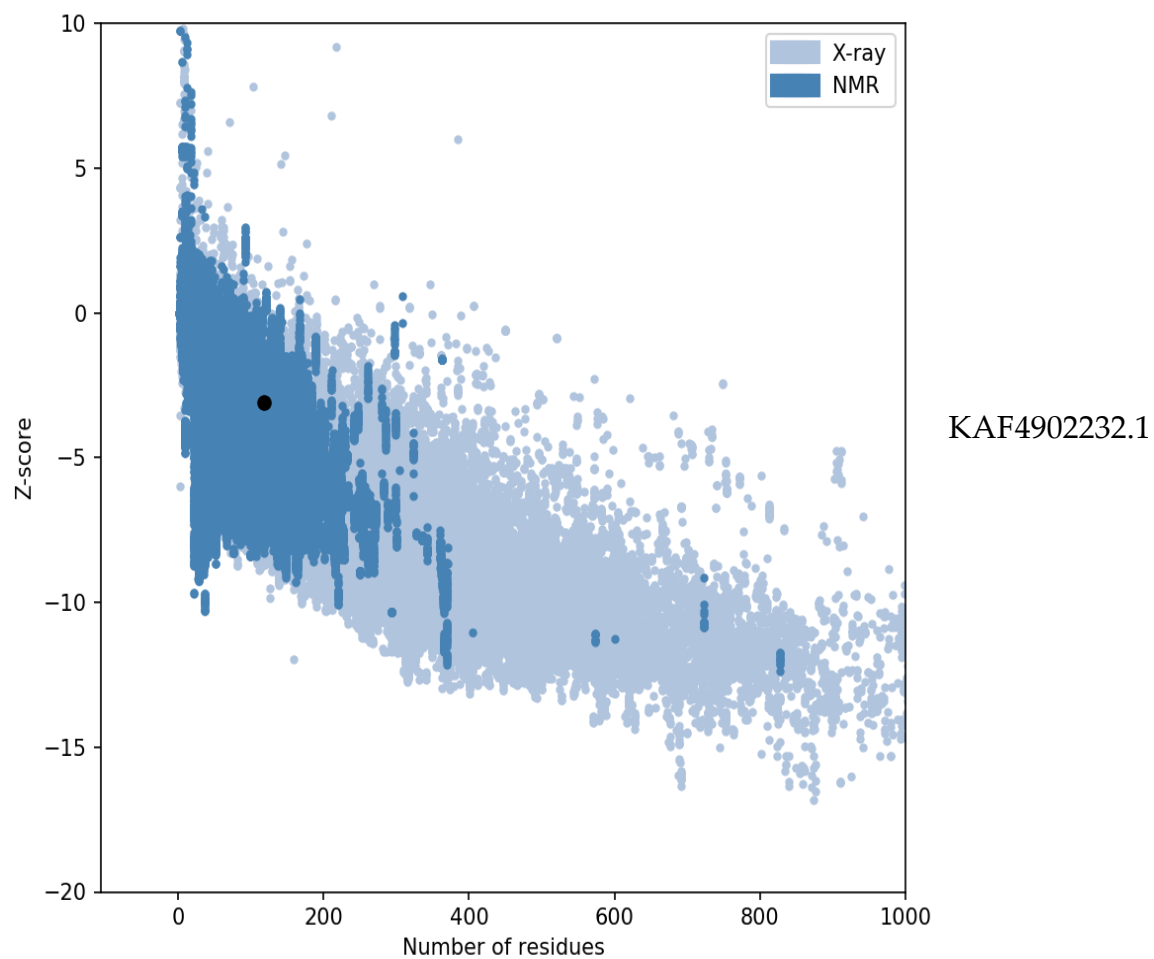

**Figure S2.** Plot of residue energies with Z-scores of representative 3D HFB II protein models generated by PROSA web.
