# Supplementary material for: In Silico Evaluation, Phylogenetic Analysis, and Structural Modeling of the Class II Hydrophobin Family from Different Fungal Phytopathogens
Source: Microorganisms. 2023 Oct 26;11(11):2632. doi: 10.3390/microorganisms11112632 (PMC10672791; doi:10.3390/microorganisms11112632)
Supplement: Supplementary file 1 [file microorganisms-11-02632-s001.zip]

Archive with 10 entries (10 files):
- Figure S1.pdf
- Figure S2.pdf
- Figure S3.pdf
- Figure S4.pdf
- Figure S5.pdf
- Table S1.pdf
- Table S2.xlsx
- Table S3.xlsx
- Table S4.xlsx
- Table S5.xlsx
