# Supplementary material for: In Silico Evaluation, Phylogenetic Analysis, and Structural Modeling of the Class II Hydrophobin Family from Different Fungal Phytopathogens
Source: Microorganisms. 2023 Oct 26;11(11):2632. doi: 10.3390/microorganisms11112632 (PMC10672791; doi:10.3390/microorganisms11112632)
Supplement: Supplementary file 1 [file microorganisms-11-02632-s001.zip › Table S2.xlsx]

## Sheet: Sheet1
Protein ID	A.A. length	M.W. (Kda)	PI	Cys	Positive R	Negative R	Ext. coef.	II	AI	GRAVY
XP_049133698.1	99	10.17	3.89	8 (8.1%)	3	10	3480	22.78	91.72	0.466
GJC80504.1	99	10.21	3.93	8 (8.1%)	3	9	3480	26.67	89.7	0.37
XP_047765241.1	88	8.92	3.93	8 (9.1%)	3	9	500	31.76	108.86	0.709
KAH8763703.1	106	10.4	4.16	8 (7.5%)	4	9	1990	44.16 (unstable)	94.81	0.521
KAF7195398.1	85	8.6	3.93	8 (9.4% )	3	9	1990	26.42	93.29	0.601
KAF4902232.1	97	9.94	3.89	8 (8.2%)	3	10	3480	19.27	95.57	0.512
KAF4898778.1	97	9.93	3.85	8 (8.2%)	3	10	3480	17.28	95.57	0.512
TKX25784.1	97	9.89	4.14	8 (8.2%)	3	7	3480	25.23	103.81	0.632
TEA18123.1	98	10.2	3.93	8 (8.2%)	3	9	3480	23.73	92.55	0.411
XP_023448514.1	102	10.38	3.53	8 (7.8%)	1	7	3480	33.9	90.98	0.246
KUI69349.1	105	10.25	4.03	8 (7.6%)	3	8	1990	31.2	97.71	0.702
AAB41284.1	100	10.29	4.75	8 (8.0%)	4	6	3480	56 (unstable)	85.9	0.232
ABR15767.1	99	9.67	4.17	8 (8.1%)	3	6	3480	29.98	88.89	0.69
KAH0440693.1	103	10.22	4.47	8 (7.8%)	4	7	3480	32.65	83.4	0.443
KAG7411596.1	100	10.27	6.51	8 (8.0%)	6	6	3480	26.87	78.2	0.238
XP_009650899.1	98	10.18	3.97	8 (8.2%)	3	9	3480	27.62	90.61	0.407
KAB2579811.1	91	9.25	4.01	8 (8.8%)	3	9	1990	52.47 (unstable)	104.18	0.703
TVY61978.1	100	10.3	6.1	8 (8.0%)	6	6	4970	30.08	78.2	0.257
KAH6952921.1	98	10.06	4.19	8 (8.2%)	4	8	3480	33.02	93.78	0.422
KAH7211526.1	98	10.09	4.19	8 (8.2%)	4	8	3480	25.17	92.65	0.343
KXJ87464.1	111	10.93	5.96	8 (7.2%)	4	5	4970	33.81	76.76	0.329
KAI3335996.1	140	13.46	3.71	8 (5.7%)	1	5	1990	32.38	53.93	-0.119
KAI1161130.1	99	9.91	4.33	8 (8.1%)	4	7	500	35.63	105.76	0.666
KAI1145110.1	100	10.08	3.82	8 (8.0%)	3	10	3480	30.41	92.9	0.565
XP_046128069.1	96	9.97	4.41	9 (9.4%)	5	8	3480	42.19 (unstable)	92.5	0.295
XP_046050534.1	98	10.03	4.19	8 (8.2%)	4	5	3480	27.13	96.73	0.423
XP_046013164.1	109	11.07	6.02	8 (7.3%)	8	8	4970	38.46	84.31	0.218
KAH8785973.1	99	10.28	3.8	8 (8.1%)	2	9	4970	35.82	96.57	0.493
KAH7242123.1	98	10.06	4.08	8 (8.2%)	4	9	3480	26.03	90.71	0.371
KKY33170.1	115	11.04	3.63	8 (7.0%)	2	10	1990	29	85.74	0.357
CDK12896.1	105	10.5	4.02	8 (7.6%)	5	13	1990	60.26 (unstable)	79.24	0.232
CDK12887.1	112	10.67	4.72	8 (7.1%)	6	8	1990	43.26 (unstable)	76.79	0.366
AAY89101.1	99	10.42	8.18	8 (8.1%)	9	7	500	33.44	89.9	0.158
XP_003002035.1	99	10.48	8.18	8 (8.1%)	9	7	500	30.73	87.88	0.164
XP_037187260.1	98	10.39	6.06	8 (8.2%)	7	7	1990	44.83 (unstable)	71.84	0.034
PVH84708.1	95	9.85	4.12	8 (8.4%)	3	9	500	43.88 (unstable)	108.84	0.782
CCD49285.1	98	10.22	5.98	8 (8.2%)	5	5	1990	50.41 (unstable)	81.84	0.212
CCD47622.1	98	10.2	3.89	8 (8.2%)	4	11	1990	34.92	86.63	0.414
EMR84211.1	120	12.83	6.05	9 (7.5%)	8	8	3480	42.39 (unstable)	88	0.223
KAH9224057.1	95	9.93	4.12	8 (8.4%)	3	9	1990	43.54 (unstable)	108.84	0.706
KAH8809275.1	93	9.47	4.08	9 (9.7%)	4	9	500	46.54 (unstable)	101.72	0.544
KAH7395885.1	95	9.83	4.12	8 (8.4%)	3	9	500	40.72 (unstable)	109.89	0.813
KAH7360233.1	95	9.84	4.32	8 (8.4%)	3	7	500	53.52 (unstable)	110.95	0.812
AHL20218.1	98	10.14	5.51	9 (9.2%)	6	7	1990	56.77 (unstable)	70.82	0.173
XP_040773037.1	118	11.38	4.16	8 (6.8%)	4	9	3480	40.11 (unstable)	70.42	0.249
