# Supplementary material for: In Silico Evaluation, Phylogenetic Analysis, and Structural Modeling of the Class II Hydrophobin Family from Different Fungal Phytopathogens
Source: Microorganisms. 2023 Oct 26;11(11):2632. doi: 10.3390/microorganisms11112632 (PMC10672791; doi:10.3390/microorganisms11112632)
Supplement: Supplementary file 1 [file microorganisms-11-02632-s001.zip › Table S3.xlsx]

## Sheet: Sheet1
Accession	Fungal species	GPI/non-GPI	Localization	Score
AAB41284.1	Ophiostoma ulmi	GPI-anchor	75	0.55
AAY89101.1		No GPI-anchor found	-	0
ABR15767.1		No GPI-anchor found	-	0
AHL20218.1		No GPI-anchor found	-	0
CCD47622.1		No GPI-anchor found	-	0
CCD49285.1		No GPI-anchor found	-	0
CDK12887.1		No GPI-anchor found	-	0
CDK12896.1		No GPI-anchor found	-	0
EMR84211.1		No GPI-anchor found	-	0
GJC80504.1		No GPI-anchor found	-	0
KAB2579811.1	Lasiodiplodia theobromae	GPI-anchor	66	1
KAF4898778.1		No GPI-anchor found	-	0
KAF4902232.1		No GPI-anchor found	-	0
KAF7195398.1		No GPI-anchor found	-	0
KAG7411596.1		No GPI-anchor found	-	0
KAH0440693.1		No GPI-anchor found	-	0
KAH6952921.1		No GPI-anchor found	-	0
KAH7211526.1		No GPI-anchor found	-	0
KAH7242123.1		No GPI-anchor found	-	0
KAH7360233.1		No GPI-anchor found	-	0
KAH7395885.1		No GPI-anchor found	-	0
KAH8763703.1	Diaporthe	GPI-anchor	79	0.55
KAH8785973.1		No GPI-anchor found	-	0
KAH8809275.1		No GPI-anchor found	-	0
KAH9224057.1		No GPI-anchor found	-	0
KAI1145110.1		No GPI-anchor found	-	0
KAI1161130.1		No GPI-anchor found	-	0
KAI3335996.1		No GPI-anchor found	-	0
KKY33170.1	Diaporthe	GPI-anchor	91	0.7
KUI69349.1	Valsa mali	GPI-anchor	74	1
KXJ87464.1		No GPI-anchor found	-	0
PVH84708.1		No GPI-anchor found	-	0
TEA18123.1		No GPI-anchor found	-	0
TKX25784.1		No GPI-anchor found	-	0
TVY61978.1		No GPI-anchor found	-	0
XP_003002035.1		No GPI-anchor found	-	0
XP_009650899.1		No GPI-anchor found	-	0
XP_023448514.1		No GPI-anchor found	-	0
XP_037187260.1		No GPI-anchor found	-	0
XP_040773037.1		No GPI-anchor found	-	0
XP_046013164.1		No GPI-anchor found	-	0
XP_046050534.1		No GPI-anchor found	-	0
XP_046128069.1		No GPI-anchor found	-	0
XP_047765241.1	Fulvia fulva	GPI-anchor	61	1
XP_049133698.1		No GPI-anchor found	-	0
