# Supplementary material for: In Silico Evaluation, Phylogenetic Analysis, and Structural Modeling of the Class II Hydrophobin Family from Different Fungal Phytopathogens
Source: Microorganisms. 2023 Oct 26;11(11):2632. doi: 10.3390/microorganisms11112632 (PMC10672791; doi:10.3390/microorganisms11112632)
Supplement: Supplementary file 1 [file microorganisms-11-02632-s001.zip › Table S4.xlsx]

## Sheet: Sheet1
#Identifier	Cytoplasmic effector	Apoplastic effector	Non-effector	Prediction
XP_049133698.1 Colletotrichum spaethianum	-	Y (0.763)	-	Apoplastic effector
GJC80504.1 Colletotrichum liriopes	-	Y (0.772)	-	Apoplastic effector
XP_047765241.1 Fulvia fulva	-	Y (0.736)	-	Apoplastic effector
KAH8763703.1 Diaporthe sp. PMI_573	-	Y (0.828)	-	Apoplastic effector
KAF7195398.1 Pseudocercospora fuligena	-	Y (0.719)	-	Apoplastic effector
KAF4902232.1 Colletotrichum viniferum	-	Y (0.763)	-	Apoplastic effector
KAF4898778.1 Colletotrichum fructicola	-	Y (0.763)	-	Apoplastic effector
TKX25784.1 Elsinoe australis	-	Y (0.649)	-	Apoplastic effector
TEA18123.1 Colletotrichum sidae	-	Y (0.739)	-	Apoplastic effector
XP_023448514.1 Cercospora beticola	-	Y (0.929)	-	Apoplastic effector
KUI69349.1 Valsa mali	-	Y (0.793)	-	Apoplastic effector
AAB41284.1 Ophiostoma ulmi	-	Y (0.834)	-	Apoplastic effector
ABR15767.1 Ophiostoma quercus	-	Y (0.719)	-	Apoplastic effector
KAH0440693.1 Colletotrichum camelliae	-	Y (0.763)	-	Apoplastic effector
KAG7411596.1 Fusarium oxysporum f. sp. raphani	-	Y (0.859)	-	Apoplastic effector
XP_009650899.1 Verticillium dahliae VdLs.17	-	Y (0.738)	-	Apoplastic effector
KAB2579811.1 Lasiodiplodia theobromae	-	Y (0.686)	-	Apoplastic effector
TVY61978.1 Fusarium oxysporum f. sp. cubense	-	Y (0.888)	-	Apoplastic effector
KAH6952921.1 Fusarium avenaceum	-	Y (0.738)	-	Apoplastic effector
KAH7211526.1 Fusarium oxysporum	-	Y (0.772)	-	Apoplastic effector
KXJ87464.1 Microdochium bolleyi	-	Y (0.734)	-	Apoplastic effector
KAI3335996.1 Ustulina deusta	-	Y (0.717)	-	Apoplastic effector
KAI1161130.1 Nemania serpens	-	Y (0.61)	-	Apoplastic effector
KAI1145110.1 Nemania diffusa	-	Y (0.707)	-	Apoplastic effector
XP_046128069.1 Fusarium solani	-	Y (0.894)	-	Apoplastic effector
XP_046050534.1 Fusarium redolens	-	Y (0.738)	-	Apoplastic effector
XP_046013164.1 Microdochium trichocladiopsis	-	Y (0.688)	-	Apoplastic effector
KAH8785973.1 Diaporthe sp.	-	Y (0.733)	-	Apoplastic effector
KAH7242123.1 Fusarium tricinctum	-	Y (0.772)	-	Apoplastic effector
KKY33170.1 Diaporthe ampelina	-	Y (0.896)	-	Apoplastic effector
CDK12896.1 Geosmithia langdonii	-	-	Y (0.511)	Non-effector
CDK12887.1 Geosmithia pallida	-	Y (0.667)	-	Apoplastic effector
AAY89101.1 Verticillium dahliae	Y (0.553)	Y (0.854)	-	Apoplastic/cytoplasmic effector
XP_003002035.1 Verticillium alfalfae	Y (0.555)	Y (0.562)	-	Apoplastic/cytoplasmic effector
XP_037187260.1 Botrytis fragariae	-	Y (0.88)	-	Apoplastic effector
PVH84708.1 Cadophora sp. DSE1049	-	Y (0.725)	-	Apoplastic effector
CCD49285.1 Botrytis cinerea T4	-	Y (0.766)	-	Apoplastic effector
CCD47622.1 Botrytis cinerea	-	Y (0.804)	-	Apoplastic effector
EMR84211.1 Botrytis cinerea BcDW1	-	Y (0.786)	-	Apoplastic effector
KAH9224057.1 Leptodontidium sp.	-	Y (0.726)	-	Apoplastic effector
KAH8809275.1 Xylogone sp.	-	Y (0.892)	-	Apoplastic effector
KAH7395885.1 Leotiomycetes sp.	-	Y (0.724)	-	Apoplastic effector
KAH7360233.1 Rhexocercosporidium sp.	-	Y (0.692)	-	Apoplastic effector
AHL20218.1 Clonostachys rosea	-	Y (0.825)	-	Apoplastic effector
XP_040773037.1 Cryphonectria parasitica EP155	-	Y (0.694)	-	Apoplastic effector
