# Supplementary material for: In Silico Evaluation, Phylogenetic Analysis, and Structural Modeling of the Class II Hydrophobin Family from Different Fungal Phytopathogens
Source: Microorganisms. 2023 Oct 26;11(11):2632. doi: 10.3390/microorganisms11112632 (PMC10672791; doi:10.3390/microorganisms11112632)
Supplement: Supplementary file 1 [file microorganisms-11-02632-s001.zip › Table S5.xlsx]

## Sheet: Sheet1
Protein ID	Classification	score	e value	length
AAA19638.1	I1RDW3#PHI:9245#Fghyd5_(FGSG_01831)#5518#Fusarium_graminearum#reduced_virulence_unaffected_pathogenicity	85.5	1.91 × 10-22	98
XP_049133698.1	I1RDW3#PHI:9245#Fghyd5_(FGSG_01831)#5518#Fusarium_graminearum#reduced_virulence_unaffected_pathogenicity	153.29	3.91 × 10-49	98
	O94196#PHI:458#MHP1#318829#Magnaporthe_oryzae#reduced_virulence	137.89	3.78 × 10-43	102
GJC80504.1	I1RDW3#PHI:9245#Fghyd5_(FGSG_01831)#5518#Fusarium_graminearum#reduced_virulence_unaffected_pathogenicity	153.68	2.30 × 10-49	98
	O94196#PHI:458#MHP1#318829#Magnaporthe_oryzae#reduced_virulence	139.81	6.82 × 10-44	102
XP_047765241.1	I1RDW3#PHI:9245#Fghyd5_(FGSG_01831)#5518#Fusarium_graminearum#reduced_virulence_unaffected_pathogenicity	63.54	1.32 × 10-14	98
	O94196#PHI:458#MHP1#318829#Magnaporthe_oryzae#reduced_virulence	56.23	8.31 × 10-12	102
KAH8763703.1	O94196#PHI:458#MHP1#318829#Magnaporthe_oryzae#reduced_virulence	59.69	6.65 × 10-13	102
	I1RDW3#PHI:9245#Fghyd5_(FGSG_01831)#5518#Fusarium_graminearum#reduced_virulence_unaffected_pathogenicity	54.68	4.11 × 10-11	98
KAF7195398.1	I1RDW3#PHI:9245#Fghyd5_(FGSG_01831)#5518#Fusarium_graminearum#reduced_virulence_unaffected_pathogenicity	54.68	2.32 × 10-11	98
	O94196#PHI:458#MHP1#318829#Magnaporthe_oryzae#reduced_virulence	47.75	7.99 × 10-09	102
KAF4902232.1	I1RDW3#PHI:9245#Fghyd5_(FGSG_01831)#5518#Fusarium_graminearum#reduced_virulence_unaffected_pathogenicity	146.75	1.30 × 10-46	98
	O94196#PHI:458#MHP1#318829#Magnaporthe_oryzae#reduced_virulence	131.34	1.26 × 10-40	102
KAF4898778.1	I1RDW3#PHI:9245#Fghyd5_(FGSG_01831)#5518#Fusarium_graminearum#reduced_virulence_unaffected_pathogenicity	147.9	4.04 × 10-47	98
	O94196#PHI:458#MHP1#318829#Magnaporthe_oryzae#reduced_virulence	131.34	1.53 × 10-40	102
TKX25784.1	O94196#PHI:458#MHP1#318829#Magnaporthe_oryzae#reduced_virulence	106.3	8.82 × 10-31	102
	I1RDW3#PHI:9245#Fghyd5_(FGSG_01831)#5518#Fusarium_graminearum#reduced_virulence_unaffected_pathogenicity	100.52	1.18 × 10-28	98
TEA18123.1	I1RDW3#PHI:9245#Fghyd5_(FGSG_01831)#5518#Fusarium_graminearum#reduced_virulence_unaffected_pathogenicity	150.6	4.11 × 10-48	98
	O94196#PHI:458#MHP1#318829#Magnaporthe_oryzae#reduced_virulence	142.9	4.75 × 10-45	102
XP_023448514.1	O94196#PHI:458#MHP1#318829#Magnaporthe_oryzae#reduced_virulence	67.01	1.35 × 10-15	102
	I1RDW3#PHI:9245#Fghyd5_(FGSG_01831)#5518#Fusarium_graminearum#reduced_virulence_unaffected_pathogenicity	66.63	1.44 × 10-15	98
KUI69349.1	O94196#PHI:458#MHP1#318829#Magnaporthe_oryzae#reduced_virulence	67.01	1.46 × 10-15	102
	I1RDW3#PHI:9245#Fghyd5_(FGSG_01831)#5518#Fusarium_graminearum#reduced_virulence_unaffected_pathogenicity	62	9.16 × 10-14	98
AAB41284.1	I1RDW3#PHI:9245#Fghyd5_(FGSG_01831)#5518#Fusarium_graminearum#reduced_virulence_unaffected_pathogenicity	78.95	2.88 × 10-20	98
	O94196#PHI:458#MHP1#318829#Magnaporthe_oryzae#reduced_virulence	77.03	2.14 × 10-19	102
ABR15767.1	I1RDW3#PHI:9245#Fghyd5_(FGSG_01831)#5518#Fusarium_graminearum#reduced_virulence_unaffected_pathogenicity	97.06	3.37 × 10-27	98
	O94196#PHI:458#MHP1#318829#Magnaporthe_oryzae#reduced_virulence	83.96	3.84 × 10-22	102
KAH6706957.1	I1RDW3#PHI:9245#Fghyd5_(FGSG_01831)#5518#Fusarium_graminearum#reduced_virulence_unaffected_pathogenicity	137.12	7.99 × 10-43	98
	O94196#PHI:458#MHP1#318829#Magnaporthe_oryzae#reduced_virulence	126.33	1.28 × 10-38	102
KAH0440693.1	O94196#PHI:458#MHP1#318829#Magnaporthe_oryzae#reduced_virulence	110.15	3.93 × 10-32	102
	I1RDW3#PHI:9245#Fghyd5_(FGSG_01831)#5518#Fusarium_graminearum#reduced_virulence_unaffected_pathogenicity	109.38	5.21 × 10-32	98
KAG7411596.1	O94196#PHI:458#MHP1#318829#Magnaporthe_oryzae#reduced_virulence	75.1	1.13 × 10-18	102
	I1RDW3#PHI:9245#Fghyd5_(FGSG_01831)#5518#Fusarium_graminearum#reduced_virulence_unaffected_pathogenicity	73.56	3.04 × 10-18	98
XP_009650899.1	I1RDW3#PHI:9245#Fghyd5_(FGSG_01831)#5518#Fusarium_graminearum#reduced_virulence_unaffected_pathogenicity	137.12	7.99 × 10-43	98
	O94196#PHI:458#MHP1#318829#Magnaporthe_oryzae#reduced_virulence	126.33	1.28 × 10-38	102
KAB2579811.1	I1RDW3#PHI:9245#Fghyd5_(FGSG_01831)#5518#Fusarium_graminearum#reduced_virulence_unaffected_pathogenicity	58.54	1.13 × 10-12	98
	O94196#PHI:458#MHP1#318829#Magnaporthe_oryzae#reduced_virulence	55.07	2.05 × 10-11	102
TVY61978.1	O94196#PHI:458#MHP1#318829#Magnaporthe_oryzae#reduced_virulence	75.48	7.42 × 10-19	102
	I1RDW3#PHI:9245#Fghyd5_(FGSG_01831)#5518#Fusarium_graminearum#reduced_virulence_unaffected_pathogenicity	73.17	4.99 × 10-18	98
KAH6952921.1	I1RDW3#PHI:9245#Fghyd5_(FGSG_01831)#5518#Fusarium_graminearum#reduced_virulence_unaffected_pathogenicity	169.47	1.53 × 10-55	98
	O94196#PHI:458#MHP1#318829#Magnaporthe_oryzae#reduced_virulence	135.19	4.96 × 10-42	102
KAH7211526.1	I1RDW3#PHI:9245#Fghyd5_(FGSG_01831)#5518#Fusarium_graminearum#reduced_virulence_unaffected_pathogenicity	172.17	1.20 × 10-56	98
	O94196#PHI:458#MHP1#318829#Magnaporthe_oryzae#reduced_virulence	131.34	1.77 × 10-40	102
KXJ87464.1	O94196#PHI:458#MHP1#318829#Magnaporthe_oryzae#reduced_virulence	102.83	2.80 × 10-29	102
	I1RDW3#PHI:9245#Fghyd5_(FGSG_01831)#5518#Fusarium_graminearum#reduced_virulence_unaffected_pathogenicity	96.67	5.81 × 10-27	98
KAI3335996.1	I1RDW3#PHI:9245#Fghyd5_(FGSG_01831)#5518#Fusarium_graminearum#reduced_virulence_unaffected_pathogenicity	107.84	8.65 × 10-31	98
	O94196#PHI:458#MHP1#318829#Magnaporthe_oryzae#reduced_virulence	89.74	7.41 × 10-24	102
KAI1161130.1	I1RDW3#PHI:9245#Fghyd5_(FGSG_01831)#5518#Fusarium_graminearum#reduced_virulence_unaffected_pathogenicity	121.32	9.70 × 10-37	98
	O94196#PHI:458#MHP1#318829#Magnaporthe_oryzae#reduced_virulence	105.14	2.32 × 10-30	102
KAI1145110.1	I1RDW3#PHI:9245#Fghyd5_(FGSG_01831)#5518#Fusarium_graminearum#reduced_virulence_unaffected_pathogenicity	127.87	3.05 × 10-39	98
	O94196#PHI:458#MHP1#318829#Magnaporthe_oryzae#reduced_virulence	125.56	2.61 × 10-38	102
XP_046128069.1	I1RDW3#PHI:9245#Fghyd5_(FGSG_01831)#5518#Fusarium_graminearum#reduced_virulence_unaffected_pathogenicity	161.77	1.50 × 10-52	98
	O94196#PHI:458#MHP1#318829#Magnaporthe_oryzae#reduced_virulence	130.18	3.70 × 10-40	102
XP_046050534.1	I1RDW3#PHI:9245#Fghyd5_(FGSG_01831)#5518#Fusarium_graminearum#reduced_virulence_unaffected_pathogenicity	171.4	2.49 × 10-56	98
	O94196#PHI:458#MHP1#318829#Magnaporthe_oryzae#reduced_virulence	131.72	1.27 × 10-40	102
XP_046013164.1	O94196#PHI:458#MHP1#318829#Magnaporthe_oryzae#reduced_virulence	109	1.21 × 10-31	102
	I1RDW3#PHI:9245#Fghyd5_(FGSG_01831)#5518#Fusarium_graminearum#reduced_virulence_unaffected_pathogenicity	105.53	2.30 × 10-30	98
KAH8785973.1	O94196#PHI:458#MHP1#318829#Magnaporthe_oryzae#reduced_virulence	129.8	6.06 × 10-40	102
	I1RDW3#PHI:9245#Fghyd5_(FGSG_01831)#5518#Fusarium_graminearum#reduced_virulence_unaffected_pathogenicity	126.33	1.47 × 10-38	98
KAH7242123.1	I1RDW3#PHI:9245#Fghyd5_(FGSG_01831)#5518#Fusarium_graminearum#reduced_virulence_unaffected_pathogenicity	177.56	1.09 × 10-58	98
	O94196#PHI:458#MHP1#318829#Magnaporthe_oryzae#reduced_virulence	132.88	3.61 × 10-41	102
KKY33170.1	I1RDW3#PHI:9245#Fghyd5_(FGSG_01831)#5518#Fusarium_graminearum#reduced_virulence_unaffected_pathogenicity	67.4	1.26 × 10-15	98
	O94196#PHI:458#MHP1#318829#Magnaporthe_oryzae#reduced_virulence	60.46	4.85 × 10-13	102
CDK12896.1	O94196#PHI:458#MHP1#318829#Magnaporthe_oryzae#reduced_virulence	70.09	7.62 × 10-17	102
CDK12887.1	O94196#PHI:458#MHP1#318829#Magnaporthe_oryzae#reduced_virulence	64.31	1.37 × 10-14	102
	I1RDW3#PHI:9245#Fghyd5_(FGSG_01831)#5518#Fusarium_graminearum#reduced_virulence_unaffected_pathogenicity	60.85	3.14 × 10-13	98
AAY89101.1	I1RDW3#PHI:9245#Fghyd5_(FGSG_01831)#5518#Fusarium_graminearum#reduced_virulence_unaffected_pathogenicity	65.08	5.30 × 10-15	98
	O94196#PHI:458#MHP1#318829#Magnaporthe_oryzae#reduced_virulence	59.69	5.70 × 10-13	102
XP_003002035.1	I1RDW3#PHI:9245#Fghyd5_(FGSG_01831)#5518#Fusarium_graminearum#reduced_virulence_unaffected_pathogenicity	66.24	1.96 × 10-15	98
	O94196#PHI:458#MHP1#318829#Magnaporthe_oryzae#reduced_virulence	57.38	3.56 × 10-12	102
XP_037187260.1	O94196#PHI:458#MHP1#318829#Magnaporthe_oryzae#reduced_virulence	56.23	8.94 × 10-12	102
	I1RDW3#PHI:9245#Fghyd5_(FGSG_01831)#5518#Fusarium_graminearum#reduced_virulence_unaffected_pathogenicity	52.76	1.78 × 10-10	98
PVH84708.1	O94196#PHI:458#MHP1#318829#Magnaporthe_oryzae#reduced_virulence	83.96	3.98 × 10-22	102
	I1RDW3#PHI:9245#Fghyd5_(FGSG_01831)#5518#Fusarium_graminearum#reduced_virulence_unaffected_pathogenicity	78.57	3.54 × 10-20	98
CCD49285.1	O94196#PHI:458#MHP1#318829#Magnaporthe_oryzae#reduced_virulence	56.61	6.48 × 10-12	102
	I1RDW3#PHI:9245#Fghyd5_(FGSG_01831)#5518#Fusarium_graminearum#reduced_virulence_unaffected_pathogenicity	53.14	1.07 × 10-10	98
CCD47622.1	I1RDW3#PHI:9245#Fghyd5_(FGSG_01831)#5518#Fusarium_graminearum#reduced_virulence_unaffected_pathogenicity	74.33	1.87 × 10-18	98
	O94196#PHI:458#MHP1#318829#Magnaporthe_oryzae#reduced_virulence	70.48	5.51 × 10-17	102
EMR84211.1	O94196#PHI:458#MHP1#318829#Magnaporthe_oryzae#reduced_virulence	41.59	2.12 × 10-06	102
	I1RDW3#PHI:9245#Fghyd5_(FGSG_01831)#5518#Fusarium_graminearum#reduced_virulence_unaffected_pathogenicity	37.35	8.69 × 10-05	98
KAH9224057.1	O94196#PHI:458#MHP1#318829#Magnaporthe_oryzae#reduced_virulence	85.89	6.57 × 10-23	102
	I1RDW3#PHI:9245#Fghyd5_(FGSG_01831)#5518#Fusarium_graminearum#reduced_virulence_unaffected_pathogenicity	85.11	1.12 × 10-22	98
KAH8809275.1	I1RDW3#PHI:9245#Fghyd5_(FGSG_01831)#5518#Fusarium_graminearum#reduced_virulence_unaffected_pathogenicity	87.04	1.86 × 10-23	98
	O94196#PHI:458#MHP1#318829#Magnaporthe_oryzae#reduced_virulence	80.88	4.25 × 10-21	102
KAH7395885.1	O94196#PHI:458#MHP1#318829#Magnaporthe_oryzae#reduced_virulence	81.65	2.35 × 10-21	102
	I1RDW3#PHI:9245#Fghyd5_(FGSG_01831)#5518#Fusarium_graminearum#reduced_virulence_unaffected_pathogenicity	78.95	2.66 × 10-20	98
KAH7360233.1	O94196#PHI:458#MHP1#318829#Magnaporthe_oryzae#reduced_virulence	80.49	6.39 × 10-21	102
	I1RDW3#PHI:9245#Fghyd5_(FGSG_01831)#5518#Fusarium_graminearum#reduced_virulence_unaffected_pathogenicity	76.64	1.89 × 10-19	98
AHL20218.1	O94196#PHI:458#MHP1#318829#Magnaporthe_oryzae#reduced_virulence	61.23	1.35 × 10-13	102
	I1RDW3#PHI:9245#Fghyd5_(FGSG_01831)#5518#Fusarium_graminearum#reduced_virulence_unaffected_pathogenicity	54.68	3.15 × 10-11	98
XP_040773037.1	I1RDW3#PHI:9245#Fghyd5_(FGSG_01831)#5518#Fusarium_graminearum#reduced_virulence_unaffected_pathogenicity	85.5	1.91 × 10-22	98
	O94196#PHI:458#MHP1#318829#Magnaporthe_oryzae#reduced_virulence	77.41	2.51 × 10-19	102
