# Supplementary figures and images for: In Silico Evaluation, Phylogenetic Analysis, and Structural Modeling of the Class II Hydrophobin Family from Different Fungal Phytopathogens
Source: MDPI journal article supplement (doi:10.3390/microorganisms11112632), 2023-10-26

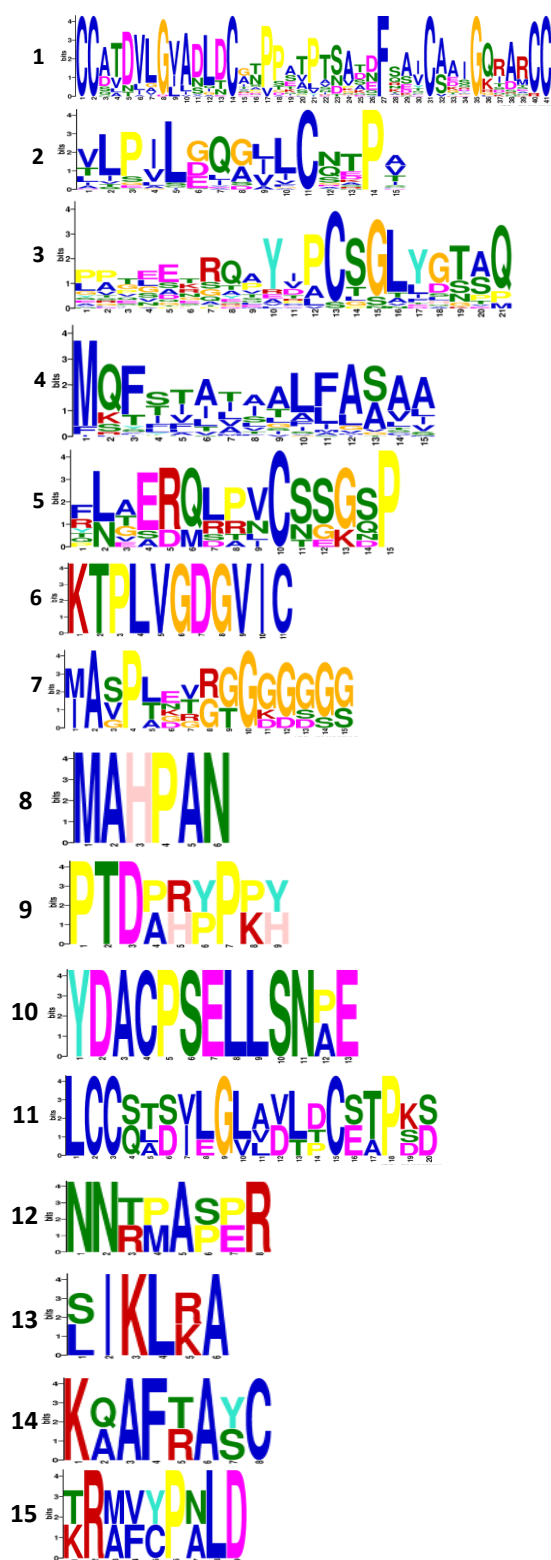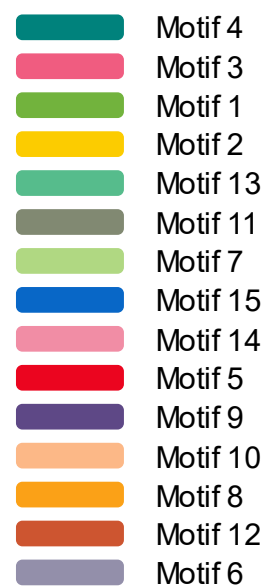

Supplement: s1 [file s1]

Entropy

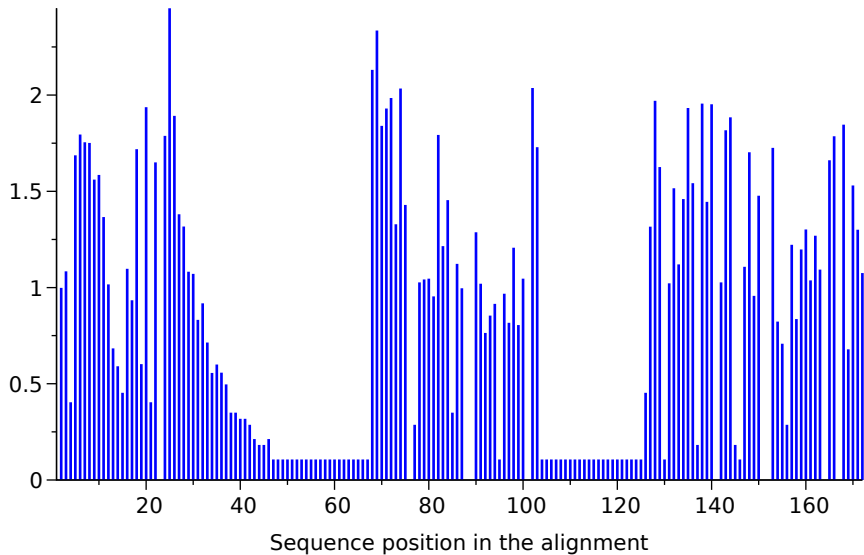

Supplement: s1 [file s1]

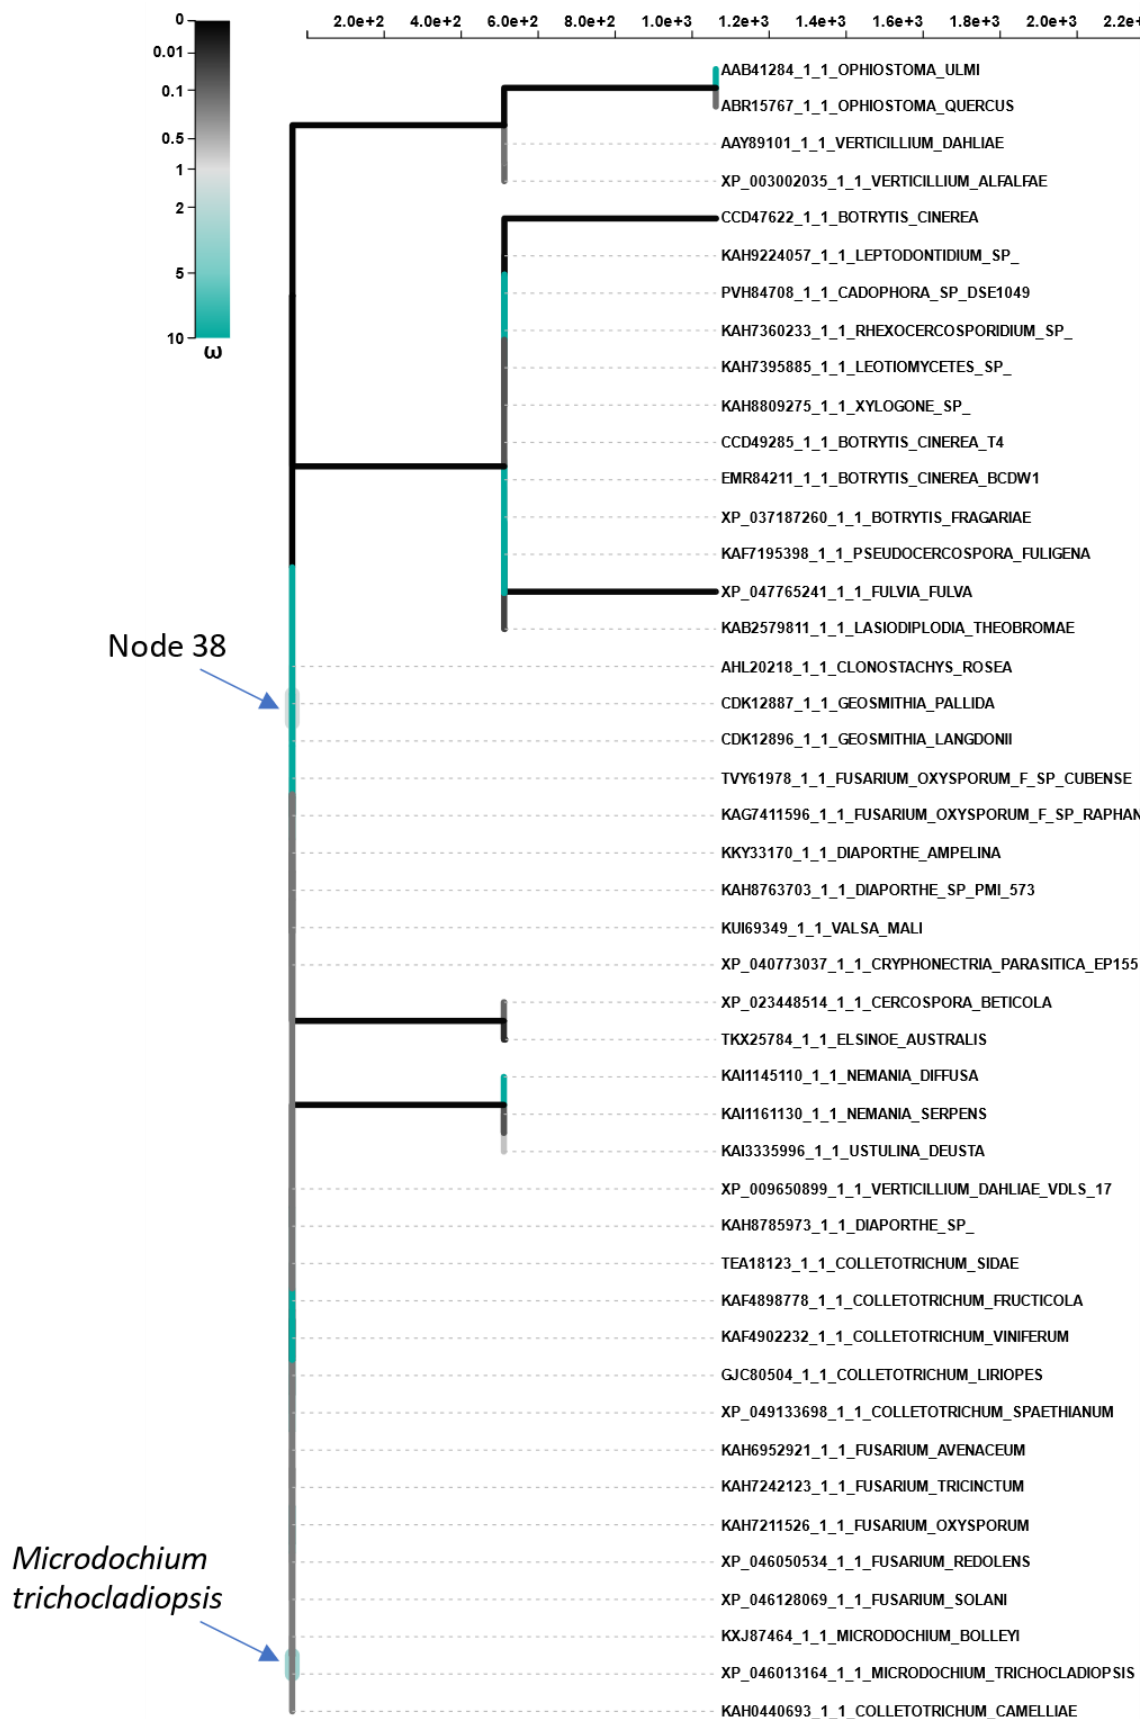

Supplement: s1 [file s1]
